# Supplementary material
Source: PubMed Central journal article supplement (PMC6447369)
Supplement: NIHMS1509378-supplement-Supplemental_Figures.pdf [file NIHMS1509378-supplement-Supplemental_Figures.pdf]

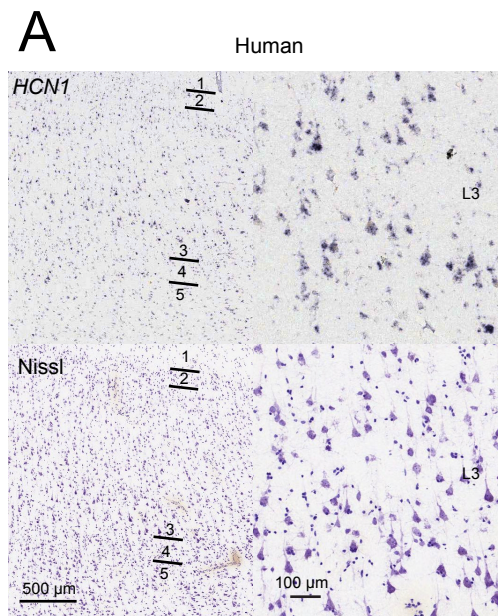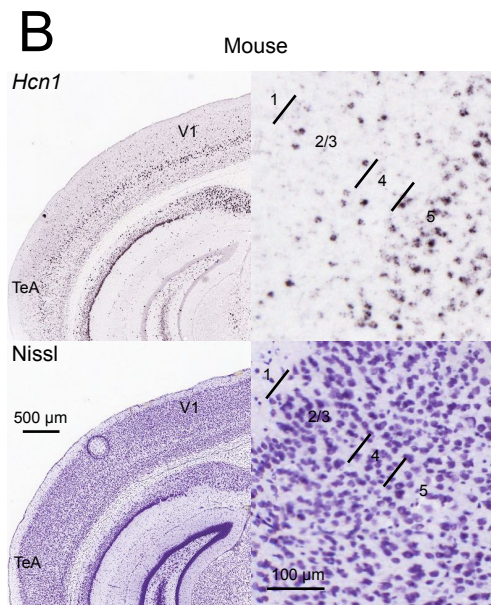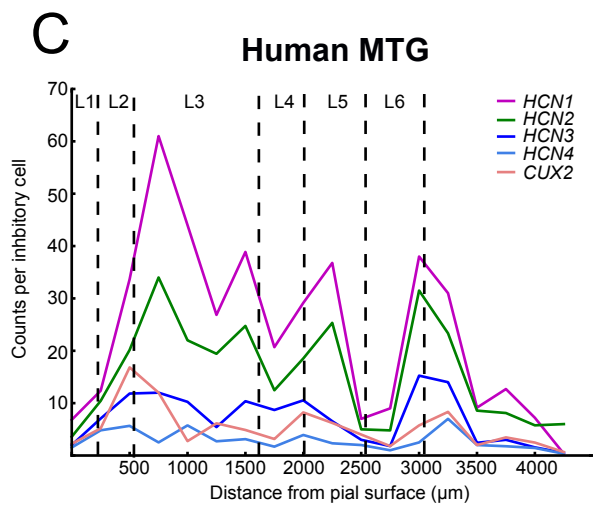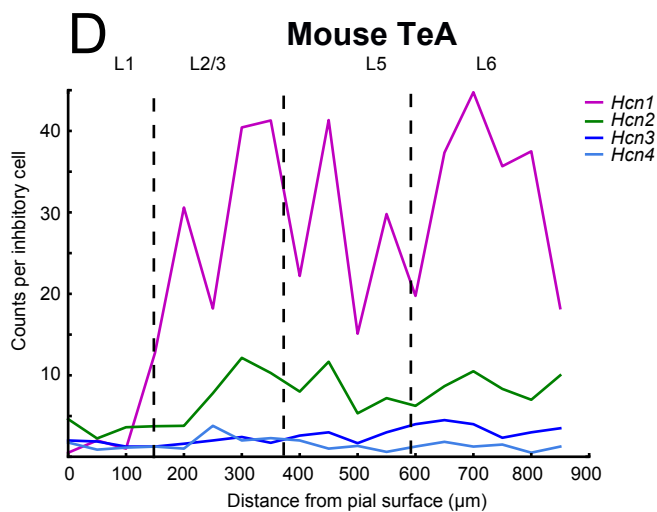

**Figure S1- H-channel Related Gene Expression in Mouse Versus Human Cortex, Related to Figure 1. A)** ISH of *HCN1* in human temporal cortex at low magnification (left column, with near adjacent Nissl stained section for layer identification) and high magnification in deep L3. **B)** ISH of *Hcn1* in mouse neocortex at low magnification (left column, with near adjacent Nissl stained section) and high magnification of TeA. Single RNA-counts per *GAD2*+ cell from mFISH data for **C)** human MTG and **D)** mouse TeA. *CUX2* was used to identify L2 and 3 in human cortex. *GAD2* was used to identify inhibitory cells.

## Human

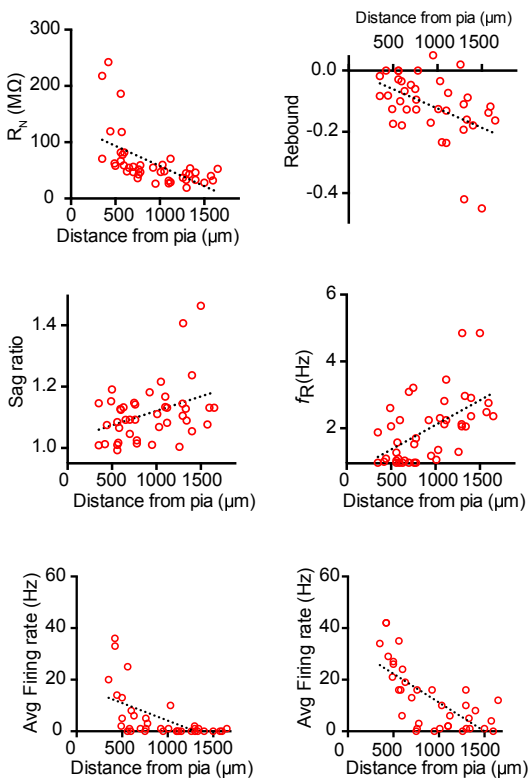

## Mouse

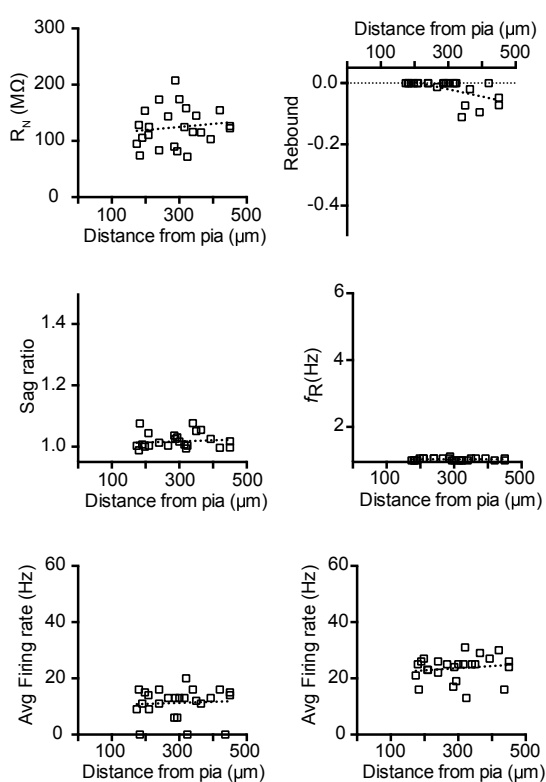

**Figure S2- Intrinsic Membrane Properties of Human (left) and Mouse (right) Supragranular Pyramidal Neurons at a Common Membrane Potential -65 mV, Related to Figure 2-5.** For human,  $R_N$  ( $r^2 = 0.32$ ,  $p < .001$ ), rebound ( $r^2 = 0.22$ ,  $p = .003$ ), sag ( $r^2 = 0.14$ ,  $p = .014$ ), resonant frequency ( $r^2 = 0.32$ ,  $p < .001$ ), number of spikes in response to 250 pA ( $r^2 = 0.33$ ,  $p < .001$ ) and 500 pA ( $r^2 = 0.49$ ,  $p < .001$ ) were all significantly correlated with somatic depth from pia when measured from a common membrane potential of -65 mV. For mouse  $R_N$  ( $r^2 = 0.02$ ,  $p = 0.53$ ), sag ( $r^2 < 0.01$ ,  $p = 0.65$ ), resonant frequency ( $r^2 < 0.01$ ,  $p = 0.99$ ), number of spikes in response to 250 pA ( $r^2 < 0.01$ ,  $p = 0.77$ ) and 500 pA ( $r^2 = 0.02$ ,  $p = 0.47$ ) were not significantly correlated with somatic depth from pia when measured from a common membrane potential of -65 mV. Only rebound was correlated with depth from pia ( $r^2 = 0.35$ ,  $p = 0.002$ ).

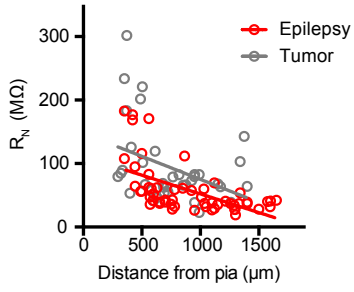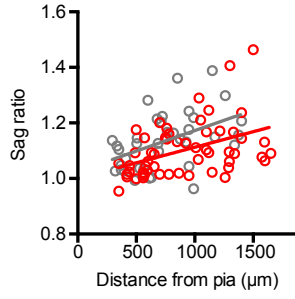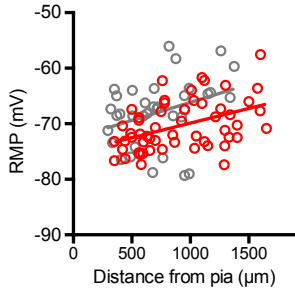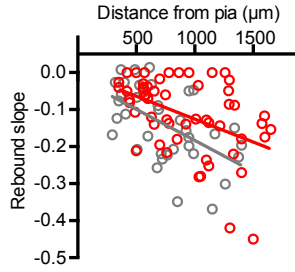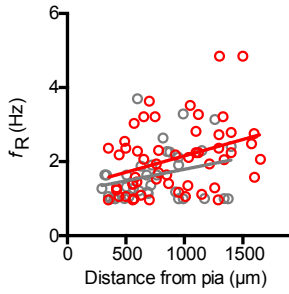

**Figure S3- Comparison of Intrinsic Membrane Properties of Supragranular Pyramidal Neurons from Epilepsy Versus Tumor Patients, Related to**

**Figures 2-4.** For tumor patients,  $R_N$  ( $r^2 = 0.14$ ,  $p = 0.02$ ), sag ratio ( $r^2 = 0.21$ ,  $p = 0.004$ ), RMP ( $r^2 = 0.11$ ,  $p = 0.046$ ) and rebound ( $r^2 = 0.29$ ,  $p < 0.001$ ) were all significantly correlated with somatic distance from the pial surface. The correlation for resonance was not statistically significant ( $r^2 = 0.08$ ,  $p = 0.105$ ). The slopes of the linear fit for  $R_N$ , sag ratio, RMP, rebound and resonance were not significantly different between tumor and epilepsy patients (for all features  $p > 0.44$ , ANCOVA). However, the y-intercepts for each linear fit depended on the disease state (for all features  $p < 0.02$ , ANCOVA) for all features but resonance ( $p = 0.08$ , ANCOVA).  $n=38$  cells from 5 donors.

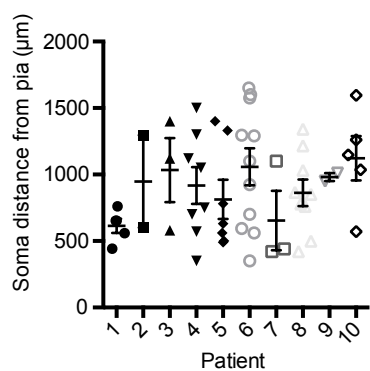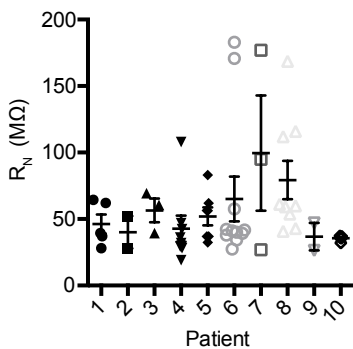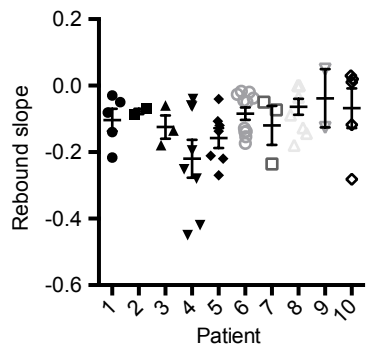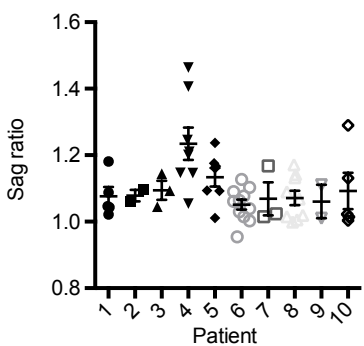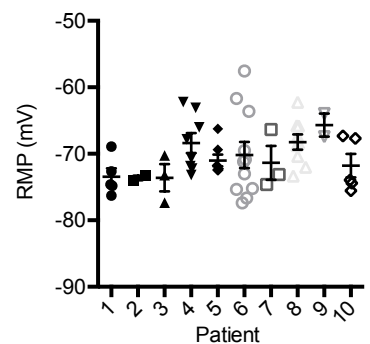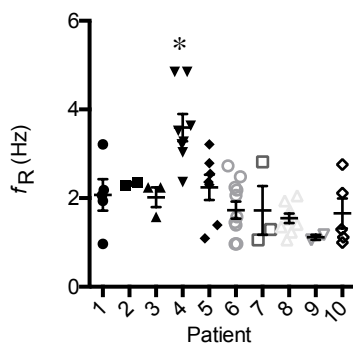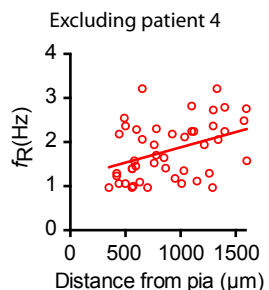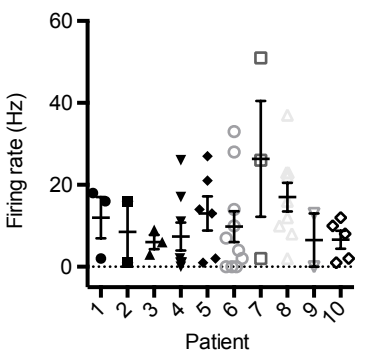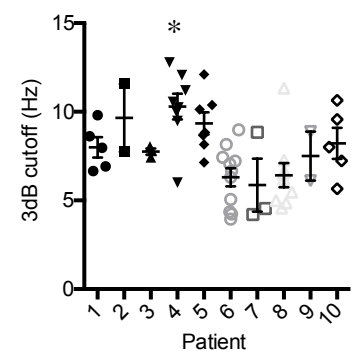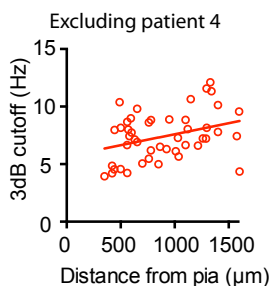

**Figure S4- h-Channel-related membrane properties as a function of patient, Related to Figures 2-5.** Data points are plotted as a function of patient and are presented as mean  $\pm$  SEM. There were no statistical differences between patients in the somatic distance from the pial surface,  $R_N$ , rebound slope, RMP and firing rate to a 500 pA current injection (all p values  $> 0.05$ , Kruskal-Wallis test). Resonant frequency and cutoff frequency were higher in neurons recorded from patient 4 compared with other patients ( $p < 0.05$  Kruskal-Wallis test followed by Dunn's multiple comparisons test). However, excluding these data points still resulted in significant correlations of resonance ( $r^2 = 0.16$ ,  $p = 0.005$ ) and cutoff ( $r^2 = 0.12$ ,  $p = 0.02$ ) with somatic distance from the pial surface (plots shown at right).



### Feature x Age

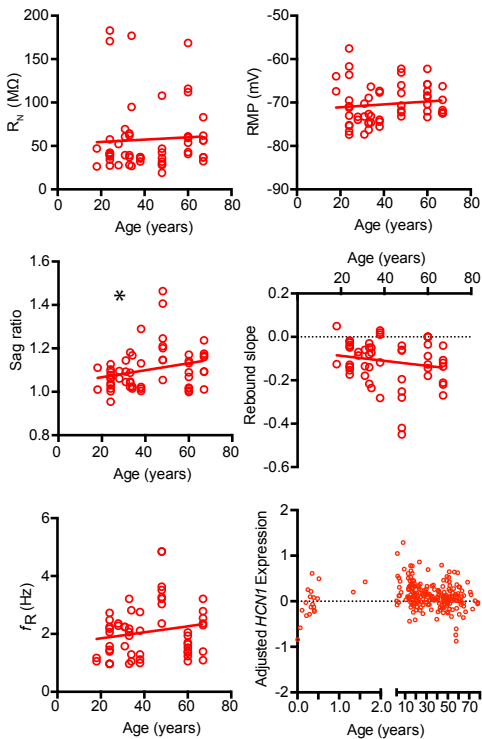

### Features x Years of seizure history

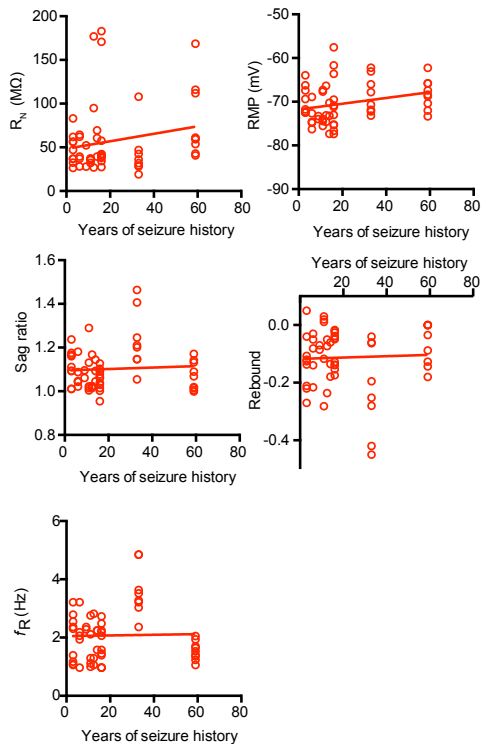

**Figure S5-  $I_h$ -related Membrane Properties as a Function of Patient Age and Years of Seizure History, Related to Figures 2-4.** All correlations (Spearman's  $r$ ) were non-significant ( $p > 0.07$ ) with the exception of sag as a function of age ( $p = 0.035$ ). Also, *HCN1* expression from braincloud.jhmi.edu (Colantuoni et al., 2011) is plotted as a function of age.

**A**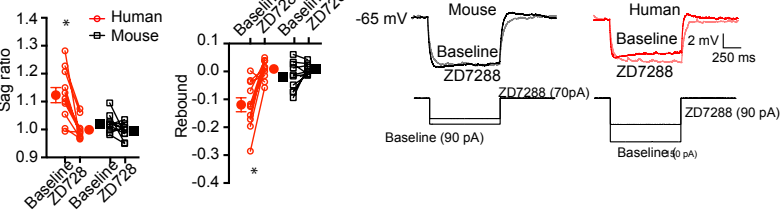**B**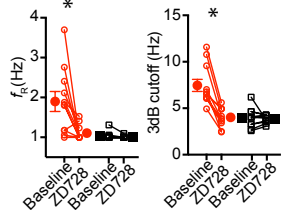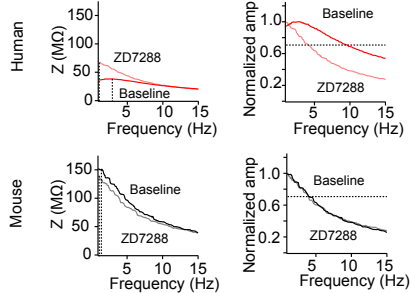**C**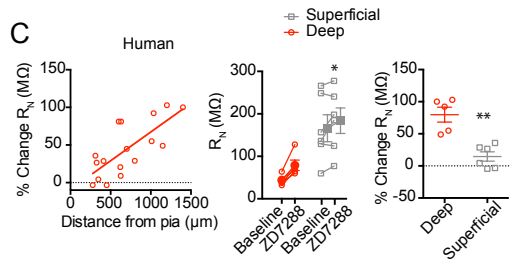**D**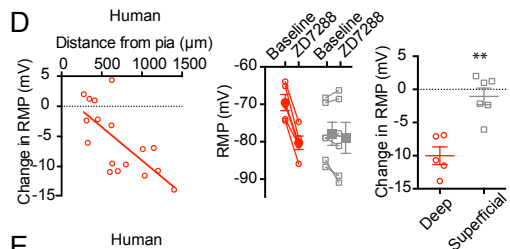**E**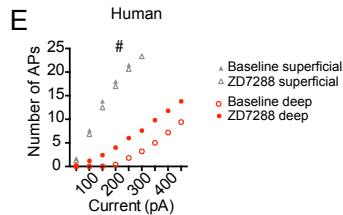

**Figure S6- The Effect of ZD7288 on Intrinsic Membrane Properties of Supragranular Pyramidal Neurons in Mouse and Human Cortex, Related to Figure 6.** A) Sag and rebound before and after the application of 10  $\mu\text{M}$  ZD7288. Example voltage responses before and after application of ZD7288 are also shown. \*  $p < 0.01$ , Bonferroni's post-hoc comparison. B) Resonance and 3dB cutoff before and after application of ZD7288. Example ZAPs and normalized frequency response curves before and after application of ZD7288 are also shown. \*  $p < 0.01$ , Bonferroni's post-hoc comparison. C) Effect of ZD7288 on intrinsic membrane properties as a function somatic distance from pial surface in human cortex. The percent change in  $R_N$  after application of ZD7288 correlated with somatic depth from the pial surface ( $n = 17$  cells from 6 donors,  $r^2 = 0.55$ ,  $p < 0.001$ ). In the presence of ZD7288, deep (soma  $> 1000 \mu\text{m}$  from pial surface,  $n = 5$  cells from 3 donors) supragranular neurons had a lower  $R_N$  than superficial neurons (soma  $< 500 \mu\text{m}$  from pial surface,  $n = 6$  from 2 donors;  $p < 0.001$  Mixed ANOVA; \*  $p < 0.025$  Bonferroni's post-hoc comparison of  $R_N$ ). The  $R_N$  of deep neurons increased by a greater percentage than superficial neurons upon application of ZD7288 (\*\*  $p < 0.001$ , t-test). D) The change in RMP after application of ZD7288 correlated with somatic depth from the pial surface in human cortex ( $r^2 = 0.48$ ,  $p = 0.002$ ). RMP in the presence of ZD7288 was equal for deep and superficial neurons ( $p > 0.05$ , Bonferroni's post hoc comparison). Deep neurons hyperpolarized more than superficial neurons upon application of ZD7288 (\*\*  $p < 0.001$ , t-test). E) FI curves for superficial and

deep neurons in human cortex were different in the presence of ZD7288 (# p <0.001, Mixed-ANOVA). Filled symbols represent mean  $\pm$  SEM.

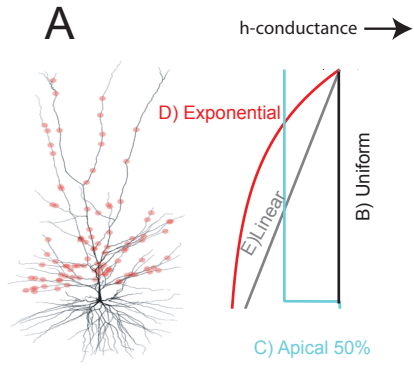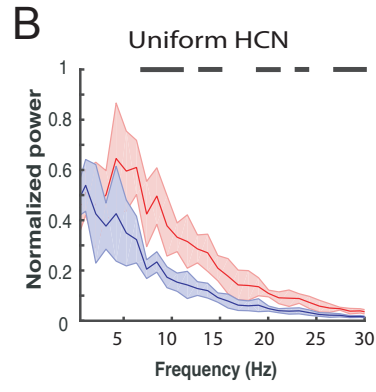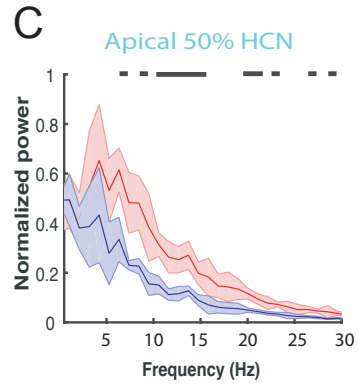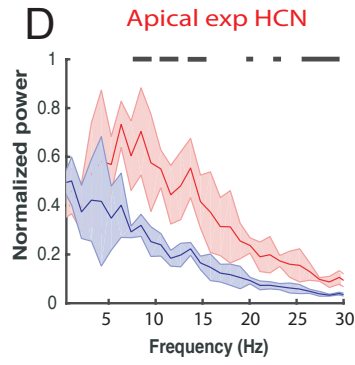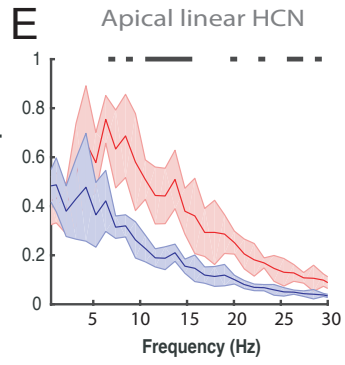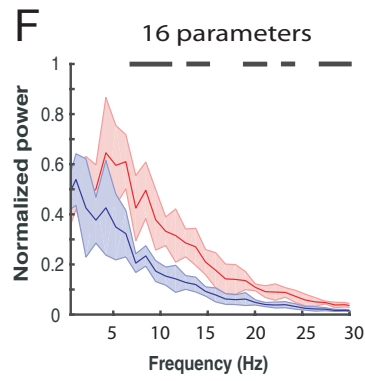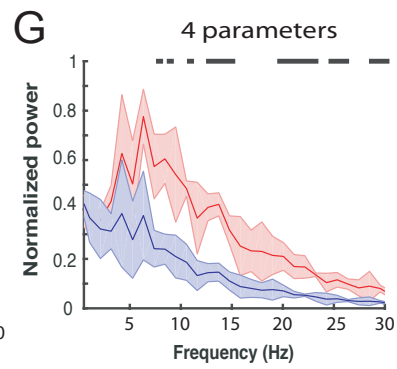

**Figure S7- Enhancement of Theta-band Signals in Somatic Membrane Potential is Robust to Different Gradients of  $I_h$  and Constrained Passive Parameters, Related to Figure 7.** Power spectrum of the somatic membrane potential of the  $I_h(+)$  and  $I_h(-)$  model when stimulated by 1000 synapses randomly located along the apical dendrite with various distributions (A) of HCN expression and passive membrane parameter models. B) Original model with uniform h-channel density. C) Model with 50% less somatic HCN density than the original model. D) Model with exponentially increasing HCN density,  $g_{HCN} = (2.849e - 07) * (-0.869 + 2.087 * \exp(0.003 * distance))$ . E) Model with linearly increasing HCN density,  $g_{HCN} = (3.427e - 07) * (1.217 + 0.007 * distance)$ . Black stripes correspond to the statistically significant differences in normalized power spectrums after correction for multiple comparisons using Bonferroni correction. Inset: location of a subset (100 out of 1000) synapses is shown as well as schematic of different h-channel gradients tested. F) The original model with 16 passive parameters, the same as in Fig. 7 H. G) A model with 4 passive parameters matched in all compartments. Black stripes correspond to the statistically significant differences in normalized power spectrums after correction for multiple comparisons using Bonferroni correction. Data are presented as mean  $\pm$  SD.

| Age (years) | Sex | Years of Seizure History | Diagnosis | Antiepileptic drugs              | Resection location |
|-------------|-----|--------------------------|-----------|----------------------------------|--------------------|
| 33          | F   | 6                        | Cavernoma | GPN, LSC, LTG, LEV, TPM          | R-temporal lobe    |
| 28          | F   | 9                        | TLE       | LSC, LTG                         | L-temporal lobe    |
| 31          | M   | 14                       | TLE       | CBZ, LRZ                         | R-temporal lobe    |
| 48          | F   | 33                       | TLE       | LEV, LTG, LRZ, ZON, PHN          | L-temporal lobe    |
| 67          | M   | 3                        | TLE       | LEV, LSC, TGB, LTG,              | L-temporal lobe    |
| 24          | F   | 16                       | TLE       | LRZ, OXZ                         | R-temporal lobe    |
| 34          | F   | 12.5                     | TLE       | LEV, LTG                         | L-temporal lobe    |
| 60          | M   | 59                       | TLE       | PHT, CBZ, LTG, LEV, GPN, PB, PRM | R-temporal lobe    |
| 18          | M   | 3                        | TLE       | PMP, GPN, LRZ,                   | R-temporal lobe    |
| 38          | F   | 11                       | TLE       | LEV, TPM                         | L-temporal lobe    |
| 47          | M   | <1                       | Tumor     | LEV                              | L-frontal          |
| 68          | F   | 0                        | Lesion    |                                  | R-temporal         |
| 57          | F   | 0                        | Tumor     |                                  | L-temporal lobe    |
| 25          | M   | <1                       | Tumor     | LEV                              | R-temporal lobe    |



|    |   |    |       |                  |                    |
|----|---|----|-------|------------------|--------------------|
| 23 | F | 10 | TLE   | LSC, LTG,<br>LRZ | R-temporal<br>lobe |
| 40 | M | 5  | TLE   | VPA, LSC,<br>CZP | R-temporal         |
| 68 | F | 0  | Tumor |                  | Frontal            |

CBZ, Carbamazepine; GPN, Gabapentin; LSC, Lacosamide; LTG, Lamotrigine; LEV, Levetiracetam; LRZ, Lorazepam; OXZ, Oxcarbazepine; PB, Phenobarbital; PMP, Perapanel; PRM, Primidone; TGB, Tiagabine; TPM, Topiramate; ZON, Zonisamide; PHN, Phenytoin; VPA, Valproic acid; CZP, Clonazepam

**Table S1** – Patient information, Related to STAR Methods
